# Supplementary material
Source: HighWire-hosted journal article supplement (https://www.jneurosci.org/highwire/filestream/598439/field_highwire_adjunct_files/1/Figure_2.pdf)
Supplement: Figure_2.pdf [file Figure_2.pdf]

## Supplementary Fig.2

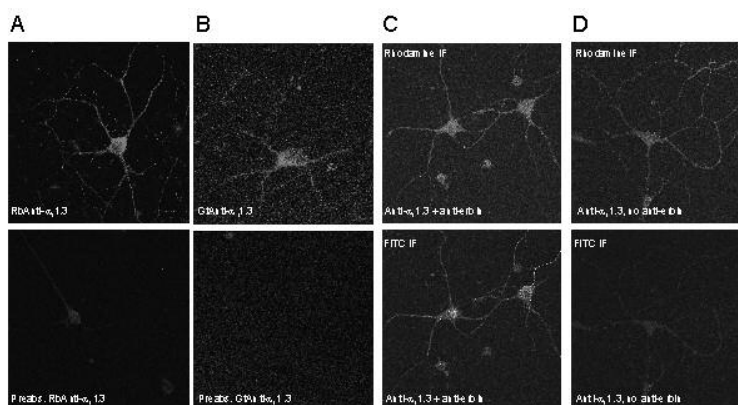**Control experiment for  $\alpha_1.3$ /erbin double-labeling protocol.**

(A) Confocal images of primary cortical neurons labeled with rabbit Anti- $\alpha_1.3$  (RbAnti- $\alpha_1.3$ ) (top) or RbAnti- $\alpha_1.3$  antibodies preadsorbed to the antigen (~5x relative to antibody concentration, preincubated for 1-2 h) (bottom) and Texas Red-conjugated secondary antibodies. Somatodendritic immunofluorescence with anti- $\alpha_1.3$  (top) was eliminated upon antigen preadsorption (bottom). (B) The same experiment was performed with goat Anti- $\alpha_1.3$  (Gt Anti- $\alpha_1.3$ ) (top) or Gt Anti- $\alpha_1.3$  preadsorbed with antigen. Somatodendritic immunofluorescence with anti- $\alpha_1.3$  (top) was eliminated upon antigen preadsorption (bottom). (C,D) Confocal images of primary cortical neurons double-labeled with antibodies against  $\alpha_1.3$  to detect  $Ca_v1.3$  and erbin. Immunofluorescence (IF) was viewed under optics for rhodamine for  $Ca_v1.3$  (top panels C and D) FITC for erbin (bottom panels C and D). Double-labeling was performed sequentially with RbAnti- $\alpha_1.3$  and erbin (C) or RbAnti- $\alpha_1.3$  and no erbin antibody (D). FITC signal was not detectable in the double-labeling protocol if erbin was omitted (C, lower panel), thus verifying that colocalization of FITC and rhodamine signal in (C) results from  $\alpha_1.3$  and erbin immunofluorescence rather than cross-reactivity of FITC anti-rabbit secondary antibodies with  $\alpha_1.3$ .
